# Supplementary material for: Effects of N-acetyl-l-cysteine on chronic heat stress-induced oxidative stress and inflammation in the ovaries of growing pullets
Source: PubMed Central journal article supplement — Poult Sci. 2022 Oct 21;102(1):102274. doi: 10.1016/j.psj.2022.102274 (PMC9673114; doi:10.1016/j.psj.2022.102274), 2022-10-21

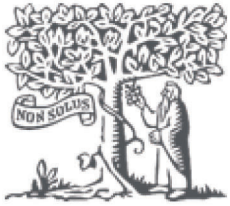

ELSEVIER

# Certificate of Elsevier Language Editing Services

**The following article was edited by Elsevier Language Editing Services:**

**"Effects of N-acetyl-l-cysteine on chronic heat stress-induced  
oxidative stress and inflammation in the ovaries of growing pullets"**

**Authored by:**

**Xianhong Cao, Lianying Guo, Changming Zhou, Cheng Huang, Guyue Li, Yu  
Zhuang, Fan Yang, Ping Liu, Guoliang Hu, Xiaona Gao and Xiaoquan Guo**

Date: 29-Sep-2022

Serial number: LE-249913-335898365654

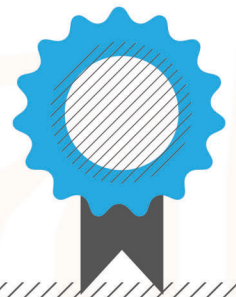

Supplement: mmc1.pdf [file mmc1.pdf]
